# Supplementary material for: An insect- and EO-based indicator reveals microhabitat-driven biodiversity intactness across Africa
Source: Research Square preprint supplement (doi:10.21203/rs.3.rs-7753989/v1), 2025-12-11
Supplement: Supplementary file 1 [file 022121274b38b03931f1f50f.docx]

# Supplementary materials

**Supplementary Figure 1: Spatial distribution of occurrence data across Africa, illustrating the manual 5-fold horizontal spatial blocking strategy used for cross-validation in the diversity model. Each colored dot represents an occurrence record. The distinct colors correspond to the five different spatial folds (Fold 1 to Fold 5) used in the cross-validation process.**


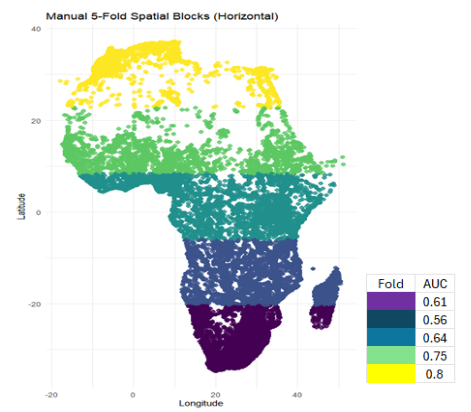


**Supplementary Figure 2: Map showing the potential landcover-derived diversity biomes across the African continent and their spatial extents. This classification is based on pre-anthropogenic landcover conditions and includes seven major biomes: forest, savanna, grassland, shrubland, wetland, waterbodies, and desert. The map serves as a baseline reference for estimating biodiversity intactness under natural ecological conditions. Country boundaries are overlaid for spatial orientation.**


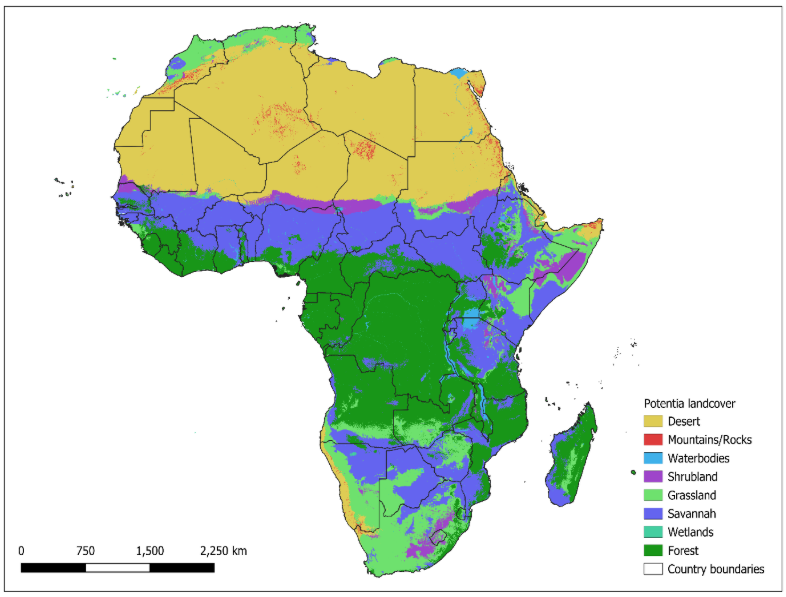


**Supplementary Figure 3: The figure displays occurrence data for *Coleoptera (11.522)*, *Lepidoptera (9.723)* and *Odonata (6.065)* across Africa. After spatial thinning, these points serve as the foundation for modeling species distribution divert, the *D* variable. The left map shows the distribution of butterflies, the middle map shows the distribution of dragonflies, while the right map shows beetles, whose points are often concentrated near aquatic habitats**


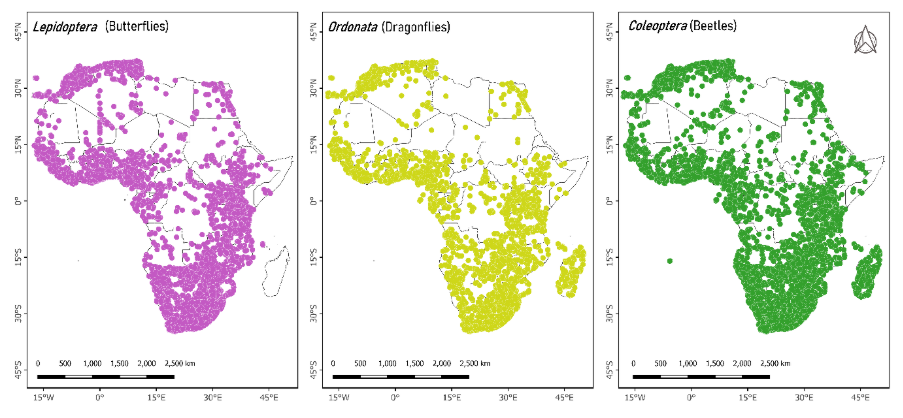


**Supplementary Notes 1: Derivation of the Biodiversity Intactness Indicator.**

This section provides details on how the biodiversity intactness indicator was derived. The newly developed biodiversity intactness indicator conceptually integrates model-derived current insect diversity with potential insect diversity baselines, mediated by anthropogenic modifications. Potential insect diversity was estimated from global habitat classifications, while current diversity was derived by rescaling predicted habitat suitability scores from the Random Forest model. Anthropogenic modification was represented by the normalized human footprint index (0 - 1), incorporating road density, built infrastructure, agriculture, and light pollution. The resulting biodiversity intactness values range from 0 (fully degraded) to 1 (intact). Outputs were harmonized to a 250 m resolution for computation and subsequently aggregated to 1-km per pixel for visualization and statistical analyses.

**Supplementary Notes 2: Computation of potential (*P)* insect diversity scores**

To capture uncertainty in baseline assumptions, we implemented both “high” and “low” P scoring schemes within the ranges supported by the literature. This approach enables sensitivity testing of the Insect Biodiversity Intactness (IBI) indicator to variation in potential diversity baselines.

**Table S1. Habitat-specific potential insect diversity (P) scores used in intactness calculations.**

| Habitat type | P (low) | P (high) | Literature basis |
| --- | --- | --- | --- |
| Forest | 1 | 1 | Newbold et al. 2015; |
| Savanna | 0.7 | 0.8 | Habel et al. 2021 |
| Grassland | 0.6 | 0.7 | Deguines et al. 2014 |
| Shrubland | 0.5 | 0.6 | Habel et al. 2021 |
| Wetland | 0.8 | 0.9 | Newbold et al. 2015 |
| Waterbodies | 0.4 | 0.5 | Purvis et al. 2018 |
| Desert | 0.2 | 0.3 | Habel et al. 2021 |

**Supplementary Notes 3: Random forest modelling workflow**

Details of the RF workflow included the integration of environmental predictor layers with georeferenced insect occurrence records. Multiple bootstrap samples were drawn from the training dataset, and an independent decision tree was fitted to each sample. Within each tree, a random subset of predictors was considered at each node split to reduce inter-tree correlation and improve generalization.

For classification, the final prediction was obtained by majority voting across all trees, while probability estimation was based on the proportion of trees predicting presence. These outputs were interpreted as habitat suitability scores. The RF algorithm was configured with 500 trees , a minimum split size of 2 samples, and a maximum tree depth of 20. Hyperparameter tuning was performed using randomized grid search with five-fold cross-validation on the training data, optimizing the Area Under the Curve (AUC).

Formally, the RF prediction for classification is expressed as:

(3)

Where ) is the prediction from the -th decision tree and, is the total number of trees.

When estimating the probability of presence, the RF output is calculated as:

(4)

where is the indicator function

**Supplementary Table S2: Characteristics of the 12 representative protected areas used for stratified sampling across Africa’s major climatic zones**

| Protected Area | Country / Region | Ecozone / Biome | Altitude Range | Avg Annual Rainfall |
| --- | --- | --- | --- | --- |
| Kakamega Forest Reserve | Kenya (E. Africa) | humid | ~1,520 m | ~1,200–1,700 mm |
| Dja Faunal Reserve | Cameroon (W. Africa) | humid | Lowland | High rainfall |
| Cross River National Park | Nigeria (W. Africa) | humid | Up to ~1,700 m | ~2,000–3,000 mm |
| Budongo Forest Reserve | Uganda (E. Africa) | humid | ~700–1,270 m | ~1,200–2,200 mm |
| Udzungwa Mountains NP | Tanzania (E. Africa) | sub-humid | ~250–2,576 m | ~600–2,000 mm |
| Ruaha National Park | Tanzania (E. Africa) | sub-humid | Moderate | Seasonal |
| Amboseli National Park | Kenya (E. Africa) | Semi-arid | ~1,180 m | ~350–400 mm |
| Tsavo East & West National Parks | Kenya (E. Africa) | Semi-arid | ~300–1,200 m | ~300–700 mm |
| Kgalagadi Transfrontier Park | Botswana / South Africa | Semi-arid | ~900–1,200 m | ~200–450 mm |
| Etosha National Park | Namibia (S. Africa) | Arid | ~1,000–1,300 m | ~350–500 mm |
| Namib-Naukluft National Park | Namibia (S. Africa) | Arid | Sea level – ~2,000 m | ~20–100 mm |

**Table S3: Selected agroforestry landscapes for biodiversity intactness assessment**

| Climate Zone | Site (Country) | Approx. Area of Agroforestry Zone (km²)* | Dominant Agroforestry System |
| --- | --- | --- | --- |
| Humid | Dja Reserve – Ombessa / Mbam-Inoubou landscape (Cameroon) | ~1,500 | Shade cocoa agroforestry, multi-strata tree–crop systems |
| Humid | Kakamega Forest fringe (Kenya) | ~800 | Smallholder agroforestry: boundary trees, fruit/coffee with shade, Eucalyptus woodlots |
| Humid | Cross River State – cocoa belt (Nigeria) | ~2,000 | Shade cocoa agroforests, smallholder tree-rich farms |
| Sub-humid | Budongo Forest fringe (Uganda) | ~1,000 | Farm–forest interface agroforestry: woodlots, boundary trees, perennial crops |
| Sub-humid | Udzungwa Mountains buffer (Tanzania) | ~1,500 | Multistrata agroforests, tree–crop mosaics, woodlots |
| Sub-humid | Atewa Range / Cocoa Belt (Ghana) | ~3,000 | Shade cocoa, fallow agroforests, planted shade trees |
